# Supplementary material for: A Survey of Snakebite Knowledge among Field Forces in China
Source: PubMed Central journal article supplement (PMC5295266; doi:10.3390/ijerph14010015), 2016-12-26

# Supplementary Materials: A Survey of Snakebite Knowledge among Field Forces in China

Chulin Chen, Li Gui, Ting Kan, Shuang Li and Chen Qiu

## Snakebite Knowledge Questionnaire

We are conducting a survey regarding your knowledge about snakebite. We ask if you could please spend 15 min to help fill out this questionnaire. The information you provide will be only used for academic research and is completely confidential. Please choose the truthful answers based on your own condition. Thank you for your participation.

Table S1. Demographic information.

| No.  | Questions                                                           | Options/Answers                                                                                                                                                                                                                                              |
|------|---------------------------------------------------------------------|--------------------------------------------------------------------------------------------------------------------------------------------------------------------------------------------------------------------------------------------------------------|
| A.1. | Gender                                                              | <input type="checkbox"/> Male<br><input type="checkbox"/> Female                                                                                                                                                                                             |
| A.2. | Age                                                                 | <input type="checkbox"/>                                                                                                                                                                                                                                     |
| A.3. | Nationality                                                         | <input type="checkbox"/>                                                                                                                                                                                                                                     |
| A.4. | How many years have you been on duty?                               | <input type="checkbox"/>                                                                                                                                                                                                                                     |
| A.5. | What's the highest education level you have obtained?               | <input type="checkbox"/> Bachelor's degree or above<br><input type="checkbox"/> College degree<br><input type="checkbox"/> Vocational degree<br><input type="checkbox"/> High school diploma<br><input type="checkbox"/> Junior high school diploma or below |
| A.6. | Are there any medical staff in your family, relatives, and friends? | <input type="checkbox"/> Yes<br><input type="checkbox"/> No                                                                                                                                                                                                  |

Table S2. Self-evaluation.

| No.  | Questions                                                                    | Options/Answers                                                                                                                                                                                                                                                         |
|------|------------------------------------------------------------------------------|-------------------------------------------------------------------------------------------------------------------------------------------------------------------------------------------------------------------------------------------------------------------------|
| B.1. | How would you rate your knowledge about snakebite?                           | <input type="checkbox"/> 3-Good<br><input type="checkbox"/> 2-Average<br><input type="checkbox"/> 1-Poor                                                                                                                                                                |
| B.2. | How would you rate your demands for knowledge about snakebite?               | <input type="checkbox"/> 3-High<br><input type="checkbox"/> 2-Moderate<br><input type="checkbox"/> 1-Low                                                                                                                                                                |
| B.3. | Where did you obtain the knowledge about snakebite?                          | <input type="checkbox"/> Military medical education<br><input type="checkbox"/> Television<br><input type="checkbox"/> Books/Magazines/Newspapers<br><input type="checkbox"/> Internet<br><input type="checkbox"/> Families/Friends<br><input type="checkbox"/> Others: |
| B.4. | Have you ever experienced snakebite?                                         | <input type="checkbox"/> Yes (Number of times: _____)<br><input type="checkbox"/> No                                                                                                                                                                                    |
| B.5. | What was your first reaction when you or your companions suffered snakebite? | <input type="checkbox"/> Too nervous to do anything<br><input type="checkbox"/> Call for surgeon or medical corpsmen<br><input type="checkbox"/> Take simple interventions immediately                                                                                  |

**Table S3.** Knowledge about snakebite.

| No.  | Questions                                                                                                                      | Options/Answers                                                                                                                                                                                                                                                                                                                                                                                                   |
|------|--------------------------------------------------------------------------------------------------------------------------------|-------------------------------------------------------------------------------------------------------------------------------------------------------------------------------------------------------------------------------------------------------------------------------------------------------------------------------------------------------------------------------------------------------------------|
| C.1. | Which of the following are high-incidence periods of snakebite?                                                                | <input type="checkbox"/> Noontime<br><input type="checkbox"/> Nighttime<br><input type="checkbox"/> After the rain<br><input type="checkbox"/> Summer<br><input type="checkbox"/> Winter                                                                                                                                                                                                                          |
| C.2. | What are the symptoms of snakebite?                                                                                            | <input type="checkbox"/> Local bleeding and swelling<br><input type="checkbox"/> Severe pain at the site of the bite<br><input type="checkbox"/> Nausea and vomiting<br><input type="checkbox"/> Drowsiness and weakness<br><input type="checkbox"/> Dizziness                                                                                                                                                    |
| C.3. | When handling dead snakes, people may suffer venom injection by an accidental scratch from the fang of a snake's severed head. | <input type="checkbox"/> True<br><input type="checkbox"/> False                                                                                                                                                                                                                                                                                                                                                   |
| C.4. | The venomous snake's head is usually oval shaped, with regular teeth marks.                                                    | <input type="checkbox"/> True<br><input type="checkbox"/> False                                                                                                                                                                                                                                                                                                                                                   |
| C.5. | Which of the following behaviors are likely to cause a snakebite during field training?                                        | <input type="checkbox"/> Wear proper shoes or boots and long trousers instead of sandals or bare-foot<br><input type="checkbox"/> Straight over rocks or logs rather than step on them<br><input type="checkbox"/> Do not use a light (torch, flashlight or lamp) when walking at night<br><input type="checkbox"/> Rest near the holes, nests and other hidden places                                            |
| C.6. | What would you do with the wound if someone suffered a snakebite?                                                              | <input type="checkbox"/> Rinsing (not scrubbing) the wound with water as soon as possible<br><input type="checkbox"/> Attempt to suck the venom out of the wound<br><input type="checkbox"/> Application of ice packs<br><input type="checkbox"/> Making local incisions at the site of the bite<br><input type="checkbox"/> Application of alcohol<br><input type="checkbox"/> Massage the bite wound            |
| C.7. | Apart from calling for help, which of the following first-aid measures would you take if someone suffered a snakebite?         | <input type="checkbox"/> Tell him/her to stay calm<br><input type="checkbox"/> Immobilize the victim's whole body, especially the wounded limb<br><input type="checkbox"/> Raise the site of the bite above the level of the person's heart<br><input type="checkbox"/> Application of tight tourniquets around the upper part of the limb<br><input type="checkbox"/> Applying a pressure immobilization bandage |

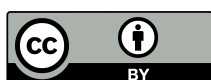

Supplement: ijerph-14-00015-s001.pdf [file ijerph-14-00015-s001.pdf]
